# Supplementary material for: C–O Hydrogenolysis of C3–C4 Polyols Selectively to Terminal Diols over Pt/W/SBA-15 Catalysts
Source: MDPI journal article supplement (doi:10.3390/catal12091070), 2022-09-19
Supplement: s1 [file s1]

## C–O Hydrogenolysis of C3–C4 Polyols Selectively to Terminal Diols over Pt/W/SBA-15 Catalysts

---

- Figure S1** Platinum particle size distribution patterns for xPt/1W/SBA-15 catalysts.
- Figure S2** Nitrogen-physisorption isotherms and pore size distribution profile of 2Pt/1W/SBA-15.
- Figure S3** (a) High-angle annular dark field image and elemental mapping of (b) Pt and (c) W of 2Pt/1W/SBA-15.
- Figure S4** FT-Raman spectrum of 2Pt/1W/SBA-15.
- Figure S5** NH<sub>3</sub>-TPD profiles of 4Pt/SBA-15 and xPt/1W/SBA-15.
- Table S1** Catalytic activity data for erythritol hydrogenolysis over xPt/W/SBA-15 catalysts.
- Table S2** Catalytic activity data for glycerol hydrogenolysis over xPt/1W/SBA-15 catalysts.

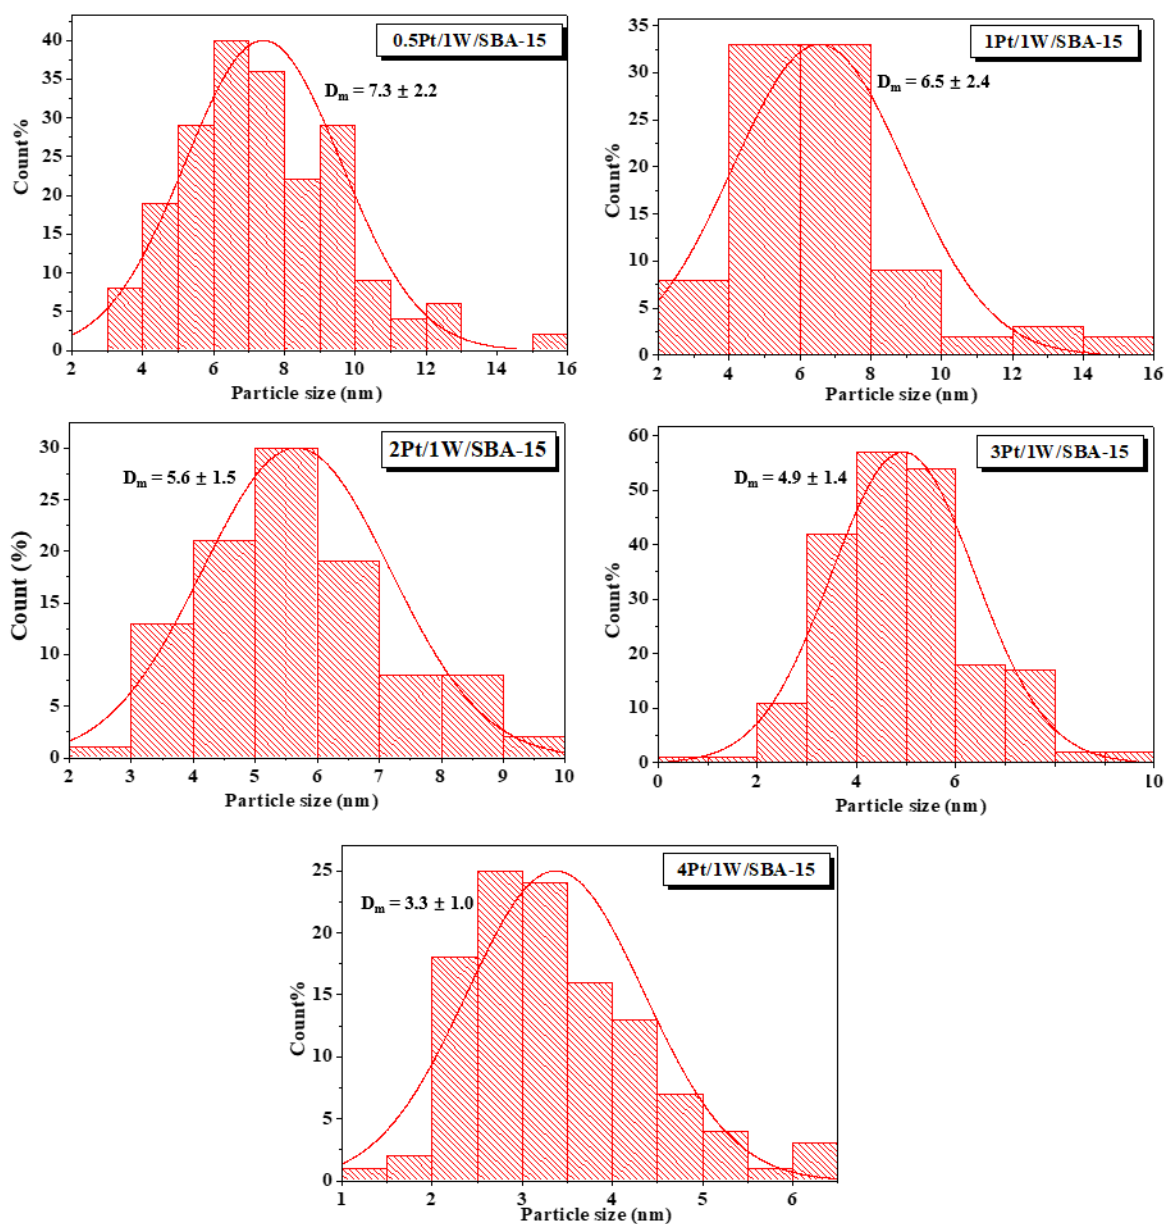

**Figure S1.** Platinum particle size distribution patterns for xPt/1W/SBA-15 catalysts.

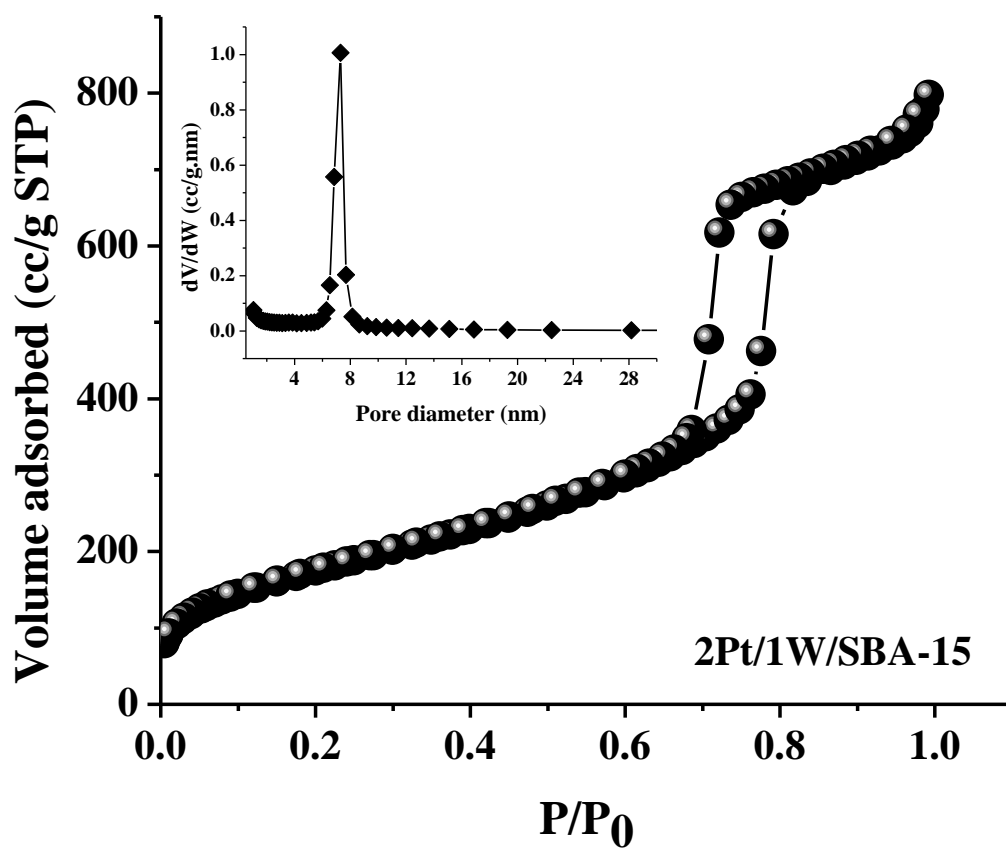

**Figure S2.** Nitrogen-physisorption isotherms and pore size distribution profile of 2Pt/1W/SBA-15.

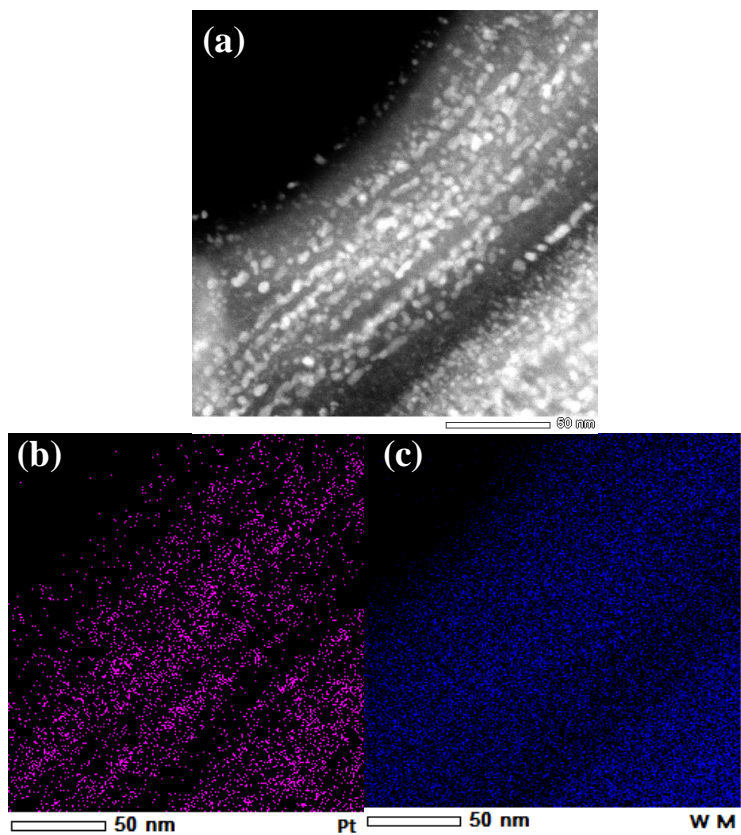

**Figure S3.** (a) High-angle annular dark field image and elemental mapping of (b) Pt and (c) W of 2Pt/1W/SBA-15.

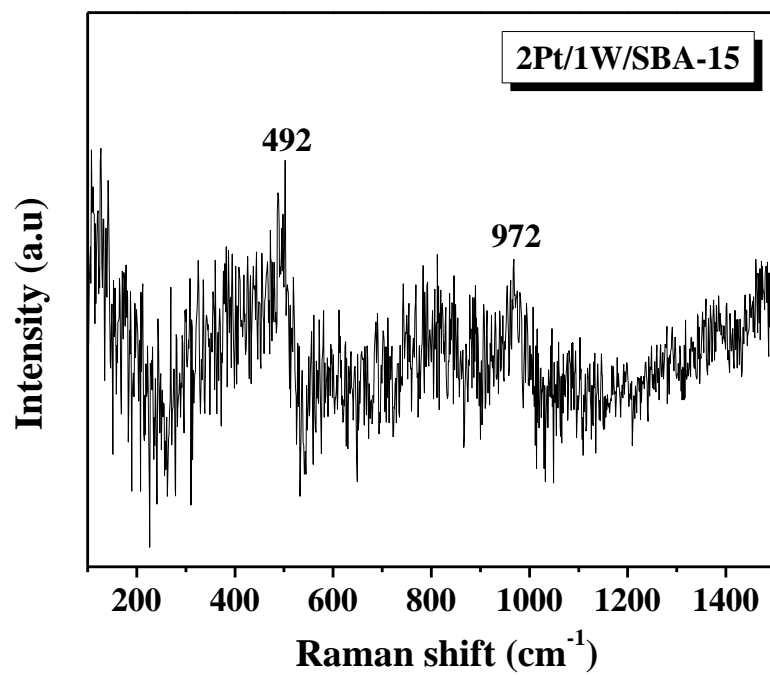

**Figure S4.** FT-Raman spectrum of 2Pt/1W/SBA-15.

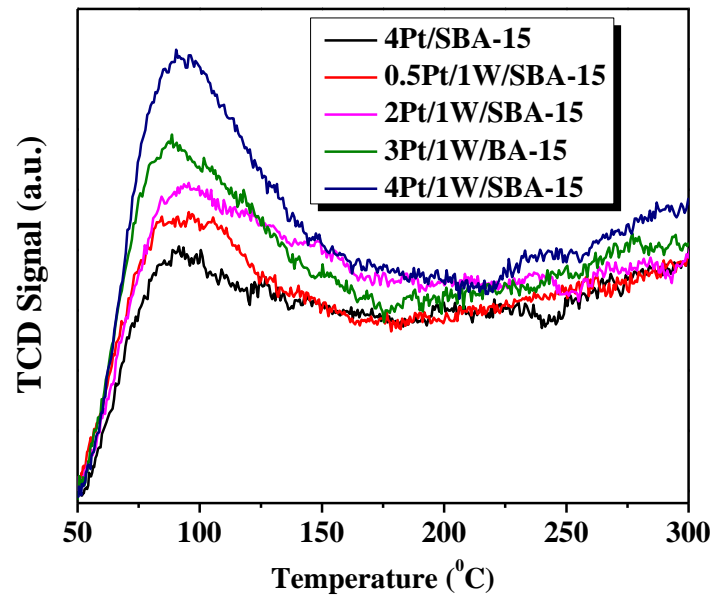

**Figure S5.** NH<sub>3</sub>-TPD profiles of 4Pt/SBA-15 and xPt/1W/SBA-15.

**Table S1.** Catalytic activity data for erythritol hydrogenolysis over xPt/W/SBA-15 catalysts<sup>a</sup>

| Entry No. | Catalyst        | Erythritol conversion (%) | Products selectivity (%) |           |         |         |      |      |        | Yield of 1,4-BDO (%) |
|-----------|-----------------|---------------------------|--------------------------|-----------|---------|---------|------|------|--------|----------------------|
|           |                 |                           | 1,2,3-BTO                | 1,2,4-BTO | 1,4-BDO | 2,3-BDO | 1-BO | 2-BO | Others |                      |
| 1         | 1W/SBA-15       | 6.2                       | 0                        | 0         | 0       | 0       | 0    | 0    | 100    | 0                    |
| 2         | 4Pt-SBA-15      | 4.8                       | 11.6                     | 18.4      | 37.1    | 0       | 0    | 0.4  | 32.5   | 1.8                  |
| 3         | 0.5Pt/1W/SBA-15 | 3.6                       | 0                        | 0         | 0       | 0       | 0    | 0    | 100    | 0                    |
| 4         | 1Pt/1W/SBA-15   | 2.1                       | 5.2                      | 3.3       | 11.5    | 0       | 0    | 0    | 80.0   | 0.2                  |
| 5         | 2Pt/1W/SBA-15   | 14.7                      | 6.0                      | 53.0      | 24.4    | 4.5     | 2.1  | 0    | 10.0   | 3.6                  |
| 6         | 3Pt/1W/SBA-15   | 48.2                      | 7.5                      | 38.1      | 32.9    | 8.4     | 6.3  | 2.2  | 4.6    | 15.9                 |
| 7         | 4Pt/1W/SBA-15   | 58.1                      | 7.4                      | 32.2      | 34.8    | 10.1    | 7.4  | 2.8  | 5.3    | 20.2                 |

*Reaction conditions:* Erythritol = 0.375 g, water = 12.125 g, catalyst = 0.3125 g, reaction temperature = 190 °C, initial H<sub>2</sub> pressure = 50 bar, reaction time = 12 h, reactor volume = 50 ml, stirring speed = 600 rpm. 1,2,3-BTO = 1,2,3-butanetriol, 1,2,4-BTO = 1,2,4-butanetriol, 1,4-BDO = 1,4-butanediol, 2,3-BDO = 2,3-butanediol, 1-BuOH = 1-butanol, 2-BuOH = 2-butanol. Others = 1,4-anhydroerythritol + furans.

**Table S2.** Catalytic activity data for glycerol hydrogenolysis over xPt/1W/SBA-15 catalysts<sup>a</sup>

| Run No. | Catalyst        | Glycerol conversion (mol%) | Product selectivity (mol%) |         |      |      | Yield of 1,3-PDO (mol%) | 1,3 – PDO / 1,2 – PDO (molar ratio) |
|---------|-----------------|----------------------------|----------------------------|---------|------|------|-------------------------|-------------------------------------|
|         |                 |                            | 1,3-PDO                    | 1,2-PDO | 1-PO | 2-PO |                         |                                     |
| 1       | 0.5Pt/1W/SBA-15 | 8.9                        | 30.0                       | 20.1    | 40.1 | 9.9  | 2.7                     | 1.5                                 |
| 2       | 1Pt/1W/SBA-15   | 19.2                       | 30.0                       | 19.7    | 39.7 | 9.9  | 5.8                     | 1.5                                 |
| 3       | 2Pt/1W/SBA-15   | 41.3                       | 47.3                       | 15.8    | 26.3 | 10.5 | 19.4                    | 3.0                                 |
| 4       | 3Pt/1W/SBA-15   | 86.2                       | 39.9                       | 2.6     | 48.2 | 9.3  | 34.4                    | 15.3                                |
| 5       | 4Pt/1W/SBA-15   | 86.2                       | 40.0                       | 5.3     | 45.4 | 9.3  | 34.4                    | 7.5                                 |

<sup>a</sup>*Reaction conditions:* Glycerol = 0.75 g, water = 24.25 g, catalyst = 0.625 g, reaction temperature = 190 °C, H<sub>2</sub> pressure = 50 bar, reaction time = 12 h, reactor volume = 100 ml, stirring speed = 600 rpm.
